# Supplementary figures and images for: Construction of Signature-tagged Mutant Library in Mesorhizobium loti as a Powerful Tool for Functional Genomics
Source: PubMed Central journal article supplement — DNA Res. 2008 Jul 25;15(5):297–308. doi: 10.1093/dnares/dsn017 (PMC2575893; doi:10.1093/dnares/dsn017), 2008-07-25

| Pool set | Nodule No. | Number of detected tag | Detected tag |
|----------|------------|------------------------|--------------|
| 2        | 1          | 3                      | 6,11,39      |
| 2        | 2          | 1                      | 29           |
| 2        | 3          | 1                      | 31           |
| 2        | 4          | 1                      | 12           |
| 2        | 5          | 1                      | 14           |
| 2        | 6          | 1                      | 2            |
| 2        | 7          | 2                      | 17, 20       |
| 2        | 8          | 1                      | 25           |
| 2        | 9          | 1                      | 25           |
| 2        | 10         | 1                      | 23           |
| 2        | 11         | 1                      | 34           |
| 2        | 12         | 1                      | 39           |

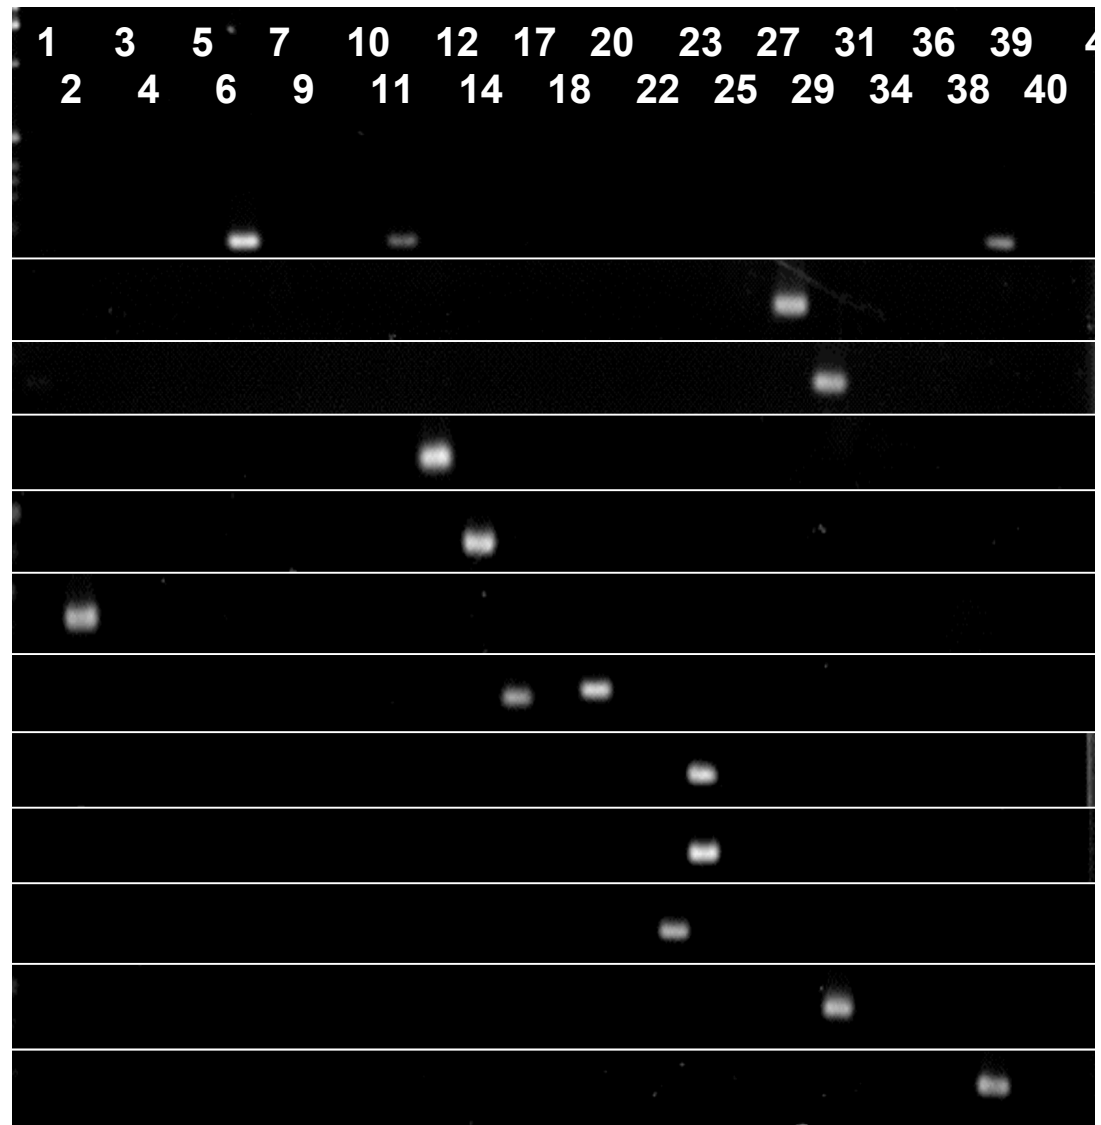

Supplement: dsn017_1.pdf [file dsn017_1.pdf]
